# Supplementary material for: Evolution of hind limb morphology of Titanosauriformes (Dinosauria, Sauropoda) analyzed via 3D Geometric Morphometrics reveals wide-gauge posture as an exaptation for gigantism
Source: bioRxiv preprint, doi:10.1101/2023.10.04.560839, version 3 (2024-12-02)
Supplement: Appendix S4 revised [file 560839_file12.xlsx]

## Sheet: Instructions
	Evolution of hind limb morphology of Titanosauriformes (Dinosauria, Sauropoda) via 3D Geometric Morphometrics reveals wide-gauge posture as an exaptation for gigantism
	By ADRIÁN PÁRAMO, P. MOCHO, F. ESCASO, F. ORTEGA
	Here there are the results of the different tests applieds on the current study. The evolutionary tests are following Butler & Goswami (2008) methodology. Pairwise comparisons of the per-node changes within a subclade are shown before the actual test results per variable.
	Body size/mass models:
	-Csize: ~log (Centroid size)
	-FmL: ~log (Femoral Length in mm)
	-qeBM: ~log (Body Mass estimated by quadratic equation model)
	-mcfBM: ~log (Body Mass estimated by Mazzeta et al. (2004) model)

## Sheet: PCA_score
	Clade	PC1	PC2	PC3	PC4	PC5	PC6	PC7	PC8	PC9	PC10	PC11	PC12	PC13	PC14	PC15	PC16	csize
Aeolosaurus	Aeolosaurini	-0.0277397	0.0113001	0.0121481	-0.0381657	0.00329049	-0.00865606	0.011994	-0.00267214	0.00249417	-0.0125975	0.00224287	-0.00573104	0.0201842	5.39535e+09	0.0107921	0.00411821	970868238164958
Ampelosaurus	Lirainosauridae	-0.00115486	-0.0190819	0.00219464	-0.00607988	0.00134807	0.017499	0.00590035	0.0396332	0.0100711	-0.00412629	-0.000512638	0.00149135	-0.00971784	0.00877317	0.00806461	-0.00409923	735521666741918
Antarctosaurus	Titanosauria	-0.0204602	0.0164216	-0.00955622	-0.00921983	0.0187352	0.0221926	0.0132952	-0.0156211	-0.011166	-0.0168224	-0.00212395	-0.0105331	-0.0122242	0.00910466	-0.00874629	0.00145782	125155112152926
Bonatitan	Lithostrotia	-0.0165862	-0.00558603	-0.00347355	-0.0267239	-0.0325443	-0.00181028	-0.0236837	0.00849936	-0.0126617	-0.00661538	-0.0211466	0.00197984	-0.00268944	-0.00777432	-0.0051044	0.00186904	507320069083697
Bonitasaura	Lithostrotia	-0.00533146	0.0227507	-0.017129	-0.00600246	0.0425186	-0.0201166	-0.0143551	0.00121001	-0.00228274	-0.00427423	0.00595478	0.0134216	-0.010826	-0.0111109	0.00530007	0.000705535	102505870161373
Dreadnoughtus	Titanosauria	0.037796	-0.0800445	-0.00488683	-0.00537614	0.019211	0.023852	-0.00680598	-0.0109653	0.00193152	0.00136857	0.00154594	0.00688308	0.0073164	-0.002704	-0.00220744	0.0038776	163451030283823
Euhelopus	Euhelopodidae	-0.0508625	-0.0116856	0.0433069	-0.0048003	0.020064	-0.00585404	-0.003517	-0.00051862	-0.0153379	0.0240472	-0.00360944	-0.0107238	-0.000904405	0.00159721	0.000302839	-0.00499976	894301687710474
Jainosaurus	Titanosauria	0.00836527	0.000887044	-0.0268241	-0.0112699	-0.0286089	-0.00289333	-0.00161602	-0.0118794	-0.0205157	0.00808712	0.0161407	0.0125572	-0.00181345	0.0113617	0.00595189	-0.00347019	116711716402841
Ligabuesaurus	Somphospondyli	-0.000425599	0.0203642	0.0187693	-0.00494411	-0.0081847	0.00102645	-0.0310889	-0.0107392	0.0288909	0.00398445	0.00759078	-0.00453311	-0.0037639	0.00928763	-0.00179986	0.00517957	148978141317305
Lirainosaurus	Lirainosauridae	-0.0143592	0.00898118	-0.0274126	0.0311887	-0.00228142	0.00723376	0.0078738	-0.0165401	0.00921709	0.00777657	-0.0239683	0.000981792	-0.000911745	0.000978905	0.0120413	0.00130724	586242402699739
Lohuecotitan	Lithostrotia	0.00375727	-0.0339928	-0.0189742	0.0030966	-0.0157077	-0.0237	0.00589729	-0.0082838	0.0114568	-0.00589282	0.00800859	-0.0185847	-0.00642933	-0.00910199	0.000155884	-0.0100621	893852167695511
Magyarosaurus	Lithostrotia	0.0684118	0.00100555	0.0585801	0.032769	-0.00788628	-0.0124251	0.00217948	-0.00436446	-0.0105351	-0.0139932	-0.00204903	0.0037562	-0.00264533	0.000906255	0.00367158	0.00063389	399061071135397
Mendozasaurus	Colossosauria	-0.0312742	0.00817254	-0.0203043	0.0446495	-0.00476051	0.0107842	-0.0103153	0.0160478	-0.0123439	-0.00111528	0.013259	-0.0116773	0.00829189	-0.00471973	-0.000732749	0.0079461	120134953594271
Muyelensaurus	Colossosauria	-0.0174356	-0.00485058	-0.0156772	0.0174467	0.0114472	-0.0310351	0.0019037	0.0078906	0.00563573	-0.00367149	-0.00711012	0.00995736	0.0126981	0.0117331	-0.0123234	-0.0046738	745650408685425
Neuquensaurus	Saltasauridae	0.0529124	0.00640299	-0.0080406	-0.0150265	-0.00513977	-0.0182085	0.0254578	0.00897717	0.0026793	0.0158848	-0.000456256	-0.00299008	-0.00588844	-0.00201608	-0.00562887	0.0125862	638255647012434
Oceanotitan	Macronaria	-0.062736	0.0102846	0.0252441	0.00621637	-0.0176516	0.0180389	0.0198463	-0.00422549	0.011583	0.001342	0.00768367	0.0174989	-0.00109083	-0.0108284	-0.00610451	-0.00195349	970308771225932
Saltasaurus	Saltasauridae	0.0771228	0.0486709	-0.00796453	-0.00775807	0.00615064	0.024072	-0.00296585	0.00355143	0.000883232	0.00661796	-0.00145001	-0.00375426	0.0104143	-0.00554122	-0.0036328	-0.0104226	654167650479989

## Sheet: PCA_eigenvalues
	eigenvalue	variance.percent	cumulative.variance.percent
PC1	0.00152779	29.92	29.92
PC2	0.000757036	14.83	44.75
PC3	0.000592929	11.61	56.36
PC4	0.000450682	8.83	65.19
PC5	0.00035821	7.02	72.21
PC6	0.000311157	6.09	78.3
PC7	0.000213285	4.18	82.48
PC8	0.000191544	3.75	86.23
PC9	0.000159117	3.12	89.35
PC10	0.000111614	2.19	91.53
PC11	0.000109783	2.15	93.68
PC12	9.97441e+09	1.95	95.64
PC13	7.9437e+09	1.56	97.19
PC14	6.03476e+09	1.18	98.38
PC15	4.68016e+09	0.92	99.29
PC16	3.6124e+08	0.71	100
PC17	2.45301e-19	0	100

## Sheet: Kruskal-Wallis
	Chi-sq	p-value	p-adjusted
PC1	11954	0.153	1
PC2	5592	0.693	1
PC3	7886	0.445	1
PC4	9647	0.291	1
PC5	5.17	0.739	1
PC6	7618	0.472	1
PC7	8915	0.35	1
PC8	8941	0.347	1
PC9	10206	0.251	1
PC10	10422	0.237	1
PC11	4768	0.782	1
PC12	5.66	0.685	1
PC13	8886	0.352	1
PC14	9856	0.275	1
PC15	10248	0.248	1
PC16	4578	0.802	1
PC17	6739	0.565	1

## Sheet: pairwise Mann-Whitney U
	PC1	PC2	PC3	PC4	PC5	PC6	PC7	PC8	PC9	PC10	PC11	PC12	PC13	PC14	PC15	PC16
Aeolosaurini_Colossosauria	1	0.667	0.667	0.667	1	1	0.667	1	0.667	1	1	0.667	1	0.667	1	1
Aeolosaurini_Euhelopodidae	1	1	1	1	1	1	1	1	1	1	1	1	1	1	1	1
Aeolosaurini_Lirainosaurinae	0.667	0.667	0.667	0.667	0.667	0.667	0.667	0.667	0.667	0.667	0.667	0.667	0.667	1	0.667	0.667
Aeolosaurini_Lithostrotia	0.4	0.8	0.8	0.4	0.8	0.8	0.4	0.8	0.8	1	0.8	0.4	0.8	0.4	0.4	0.8
Aeolosaurini_Macronaria	1	1	1	1	1	1	1	1	1	1	1	1	1	1	1	1
Aeolosaurini_Saltasauridae	0.667	1	0.667	0.667	1	1	1	1	0.667	0.667	0.667	0.667	0.667	0.667	1	0.667
Aeolosaurini_Somphospondyli	1	1	1	1	1	1	1	1	1	1	1	1	1	1	1	1
Aeolosaurini_Titanosauria	0.5	1	0.5	0.5	1	0.5	1	0.5	1	1	1	0.5	1	0.5	0.5	0.5
Colossosauria_Euhelopodidae	0.667	0.667	0.667	0.667	0.667	1	1	0.667	0.667	1	1	0.667	1	0.667	0.667	1
Colossosauria_Lirainosaurinae	0.333	1	1	0.667	1	0.667	0.333	0.333	1	0.667	1	0.333	1	0.333	1	0.333
Colossosauria_Lithostrotia	0.133	0.8	0.533	0.267	0.533	1	1	1	0.133	0.8	1	0.133	0.267	0.267	0.8	0.533
Colossosauria_Macronaria	0.667	0.667	0.667	0.667	0.667	0.667	0.667	0.667	0.667	1	0.667	0.667	0.667	1	1	1
Colossosauria_Saltasauridae	0.333	0.667	0.333	0.333	0.667	0.667	0.667	1	0.333	1	1	0.667	0.667	1	1	0.333
Colossosauria_Somphospondyli	0.667	0.667	0.667	0.667	0.667	1	0.667	0.667	0.667	1	1	0.667	1	1	1	0.667
Colossosauria_Titanosauria	0.4	1	0.8	0.2	0.8	0.4	0.8	0.8	0.8	0.8	0.8	0.2	1	0.8	1	0.4
Euhelopodidae_Lirainosaurinae	0.667	1	0.667	1	0.667	0.667	0.667	0.667	0.667	1	0.667	0.667	1	0.667	0.667	0.667
Euhelopodidae_Lithostrotia	0.4	0.8	0.8	1	0.8	0.8	1	0.4	0.4	0.8	0.8	0.4	0.4	1	0.8	0.8
Euhelopodidae_Macronaria	1	1	1	1	1	1	1	1	1	1	1	1	1	1	1	1
Euhelopodidae_Saltasauridae	0.667	0.667	0.667	0.667	0.667	1	0.667	0.667	0.667	0.667	0.667	1	0.667	0.667	1	0.667
Euhelopodidae_Somphospondyli	1	1	1	1	1	1	1	1	1	1	1	1	1	1	1	1
Euhelopodidae_Titanosauria	0.5	1	0.5	0.5	0.5	0.5	1	1	0.5	0.5	0.5	1	1	1	0.5	0.5
Lirainosaurinae_Lithostrotia	0.8	1	0.8	1	0.533	0.133	0.133	0.533	0.133	0.533	0.533	0.8	0.133	0.133	1	1
Lirainosaurinae_Macronaria	0.667	0.667	0.667	1	0.667	0.667	0.667	0.667	1	0.667	0.667	1	0.667	0.667	1	0.667
Lirainosaurinae_Saltasauridae	0.333	0.667	1	0.333	1	1	1	0.333	0.667	0.667	0.333	0.667	0.333	0.333	1	1
Lirainosaurinae_Somphospondyli	0.667	0.667	0.667	1	0.667	0.667	0.667	0.667	1	0.667	0.667	1	0.667	0.667	0.667	0.667
Lirainosaurinae_Titanosauria	0.8	1	1	0.4	0.8	0.8	0.8	0.2	1	0.4	0.8	1	0.8	0.2	0.4	0.2
Lithostrotia_Macronaria	0.4	0.8	0.8	0.8	0.8	0.4	0.4	0.4	0.4	0.8	0.4	0.4	0.8	0.4	0.8	0.8
Lithostrotia_Saltasauridae	0.267	0.267	1	0.533	0.533	0.533	0.533	0.533	0.133	1	0.533	0.533	0.533	0.267	1	1
Lithostrotia_Somphospondyli	1	0.8	0.8	1	1	0.4	0.4	0.4	0.4	0.8	0.8	1	0.4	0.8	0.4	0.4
Lithostrotia_Titanosauria	1	0.857	0.629	0.629	0.857	0.114	0.629	0.629	0.629	0.857	0.857	0.629	0.114	0.857	0.629	0.057
Macronaria_Saltasauridae	0.667	1	0.667	0.667	0.667	1	1	0.667	0.667	0.667	0.667	1	0.667	0.667	1	0.667
Macronaria_Somphospondyli	1	1	1	1	1	1	1	1	1	1	1	1	1	1	1	1
Macronaria_Titanosauria	0.5	1	0.5	0.5	1	1	0.5	0.5	1	1	0.5	1	0.5	1	1	0.5
Saltasauridae_Somphospondyli	0.667	1	0.667	0.667	0.667	1	0.667	0.667	0.667	0.667	0.667	1	0.667	0.667	1	0.667
Saltasauridae_Titanosauria	0.2	0.4	0.8	0.8	0.8	1	0.8	0.4	0.4	0.8	0.8	0.8	0.4	0.8	1	0.2
Somphospondyli_Titanosauria	1	0.5	0.5	0.5	1	1	0.5	0.5	1	1	1	1	1	1	0.5	1

## Sheet: Phylo-MANOVA
		Df	SS	MS	Rsq	F	Z	Pr(>F)
Csize	Clade	8	0.073	0.009	0.466	0.873	-0.105	0.531
	Residuals	8	0.084	0.01	0.534	NA	NA	NA
	Total	16	0.157	NA	NA	NA	NA	NA
PC1	Clade	8	0.001	0	0.686	2182	0.573	0.313
	Residuals	8	0.001	0	0.314	NA	NA	NA
	Total	16	0.002	NA	NA	NA	NA	NA
PC2	Clade	8	0	0	0.286	0.4	-0.926	0.82
	Residuals	8	0	0	0.714	NA	NA	NA
	Total	16	0.001	NA	NA	NA	NA	NA
PC3	Clade	8	0	0	0.353	0.547	-0.496	0.658
	Residuals	8	0	0	0.647	NA	NA	NA
	Total	16	0	NA	NA	NA	NA	NA
PC4	Clade	8	0	0	0.556	1254	0.121	0.452
	Residuals	8	0	0	0.444	NA	NA	NA
	Total	16	0.001	NA	NA	NA	NA	NA
PC5	Clade	8	0	0	0.59	1442	0.591	0.264
	Residuals	8	0	0	0.41	NA	NA	NA
	Total	16	0.001	NA	NA	NA	NA	NA
PC6	Clade	8	0	0	0.435	0.768	-0.316	0.625
	Residuals	8	0	0	0.565	NA	NA	NA
	Total	16	0	NA	NA	NA	NA	NA

## Sheet: Csize RMA models
	intercept	slope	CI_2.5_Slope	CI_97.5_Slope	r2	pval
PC1	0.221	-0.102	-0.168	-0.062	0.105	0.204
PC2	0.155	-0.072	-0.12	-0.043	0.054	0.371
PC3	0.137	-0.064	-0.106	-0.038	0.055	0.363
PC4	0.12	-0.055	-0.093	-0.033	0.026	0.534
PC5	-0.107	0.049	0.03	0.082	0.079	0.275
PC6	-0.1	0.046	0.028	0.076	0.086	0.254

## Sheet: partial Csize RMA models
	intercept	slope	CI_2.5_Slope	CI_97.5_Slope	r2	pval
PC1_titanosauria	0.203	-0.092	-0.161	-0.053	0.118	0.229
PC1_lithostrotia	0.246	-0.12	-0.161	-0.053	0.319	0.07
PC2_titanosauria	0.158	-0.075	-0.161	-0.053	0.117	0.232
PC2_lithostrotia	-0.127	0.066	-0.161	-0.053	0	0.952
PC3_titanosauria	0.11	-0.055	-0.161	-0.053	0.236	0.078
PC3_lithostrotia	0.14	-0.073	-0.161	-0.053	0.313	0.074
PC4_titanosauria	0.126	-0.06	-0.161	-0.053	0.025	0.592
PC4_lithostrotia	0.161	-0.08	-0.161	-0.053	0.002	0.903
PC5_titanosauria	-0.104	0.05	-0.161	-0.053	0.15	0.171
PC5_lithostrotia	-0.113	0.057	-0.161	-0.053	0.204	0.163
PC6_titanosauria	-0.102	0.048	-0.161	-0.053	0.089	0.302
PC6_lithostrotia	0.105	-0.055	-0.161	-0.053	0.003	0.871

## Sheet: FmL RMA models
	intercept	slope	CI_2.5_Slope	CI_97.5_Slope	r2	pval
PC1	0.715	-0.104	-0.173	-0.062	0.064	0.326
PC2	0.503	-0.073	-0.122	-0.044	0.056	0.36
PC3	0.446	-0.065	-0.108	-0.039	0.053	0.375
PC4	0.388	-0.056	-0.095	-0.034	0.02	0.59
PC5	-0.346	0.05	0.03	0.083	0.097	0.225
PC6	-0.323	0.047	0.028	0.077	0.097	0.223

## Sheet: partial FmL RMA models
	intercept	slope	CI_2.5_Slope	CI_97.5_Slope	r2	pval
PC1_titanosauria	0.651	-0.094	-0.167	-0.053	0.077	0.337
PC1_lithostrotia	0.856	-0.126	-0.167	-0.053	0.252	0.115
PC2_titanosauria	0.526	-0.077	-0.167	-0.053	0.125	0.215
PC2_lithostrotia	-0.461	0.069	-0.167	-0.053	0.006	0.823
PC3_titanosauria	0.378	-0.056	-0.167	-0.053	0.207	0.102
PC3_lithostrotia	0.509	-0.076	-0.167	-0.053	0.296	0.084
PC4_titanosauria	0.416	-0.061	-0.167	-0.053	0.018	0.647
PC4_lithostrotia	0.569	-0.084	-0.167	-0.053	0	0.972
PC5_titanosauria	-0.346	0.051	-0.167	-0.053	0.186	0.124
PC5_lithostrotia	-0.401	0.06	-0.167	-0.053	0.252	0.116
PC6_titanosauria	-0.336	0.049	-0.167	-0.053	0.104	0.261
PC6_lithostrotia	0.386	-0.058	-0.167	-0.053	0.002	0.903

[truncated: 21 more sheets: qeBM RMA models, partial qeBM RMA models, mcfBM RMA models, partial mcfBM RMA models, Phylogenetic signal, Pairwise traits_Titanosauriform, Pw traits_qeBM_Titanosauriform, Pairwise traits_Somphospondyli, Pw traits_qeBM_Somphospondyli, Pairwise traits_Titanosauria, Pw traits_qeBM_Titanosauria, Pairwise traits_Lithostrotia, Pw traits_qeBM_Lithostrotia, lnCsize_evolution, lnFmL_evolution, lnBMqe_evolution, lnBMmcf_evolution, PC1_evolution, PC3_evolution, PC5_evolution …]
